# Supplementary material for: SARS-CoV-2 Infection and Vaccination Coverage among Fragile Populations in a Local Health Area of Northern Italy
Source: MDPI journal article supplement (doi:10.3390/life12071009), 2022-07-07
Supplement: s1 [file s1]

**Supplementary Table S1.** Descriptive characteristics of the study population by HIV status and citizenship.

|                         |  | Italians (n=869.718) |                  |                  |         | Foreigners (n=134.492) |                  |                  |         |
|-------------------------|--|----------------------|------------------|------------------|---------|------------------------|------------------|------------------|---------|
|                         |  | TOT                  | HIV STATUS       |                  | p       | TOT                    | HIV STATUS       |                  | p       |
|                         |  |                      | positive         | negative         |         |                        | positive         | negative         |         |
| N                       |  | 869.718              | 3.284            | 866.434          |         | 134.492                | 533              | 133.959          |         |
| Male, N (%)             |  | 427.237 (49,1%)      | 2.479 (75.5%)    | 424.758 (49.0%)  | < 0,001 | 65.388 (48.6%)         | 238 (44.6%)      | 65.150 (48.6%)   | 0.07    |
| Age, median (p25-p75)   |  | 53,7 (39.6-68.5)     | 55,1 (48.6-59.6) | 53,7 (39.6-68.5) | n.s.    | 40,6 (31.5-50.8)       | 44,2 (36.6-51.7) | 40.6 (31.5-50.8) | < 0.001 |
| Age category            |  |                      |                  |                  |         |                        |                  |                  |         |
| 18-49 N (%)             |  | 370.599 (42.6%)      | 938 (28.6%)      | 369.661 (42.6%)  | < 0,001 | 98.987 (73.6%)         | 373 (70.0%)      | 98.614 (73.6%)   | < 0.001 |
| 50-69 N (%)             |  | 239.088 (27.5%)      | 1.990 (60.6%)    | 237.098 (27.4%)  |         | 27.422 (20.4%)         | 150 (28,1%)      | 27.272 (20.4%)   |         |
| >70 N (%)               |  | 260.031 (29.9%)      | 356 (10.8%)      | 259.675 (30.0%)  |         | 8.083 (6.0%)           | 10 (1.9%)        | 8.073 (6.0%)     |         |
| Comorbidity             |  |                      |                  |                  |         |                        |                  |                  |         |
| none                    |  | 461.536 (53.1%)      | 1.328 (40.5%)    | 460.208 (53.1%)  | < 0,001 | 102.053 (75.9%)        | 351 (65.9%)      | 101.702 (75.9%)  | < 0.001 |
| 1                       |  | 175.370 (20.2%)      | 839 (25.5%)      | 174.531 (20.2%)  |         | 20.928 (15.6%)         | 94 (17.6%)       | 20.834 (15.6%)   |         |
| 2-3                     |  | 163.761 (18.8%)      | 853 (26.0%)      | 162.908 (18.8%)  |         | 9.585 (7.1%)           | 79 (14.8%)       | 9.506 (7.1%)     |         |
| >3                      |  | 69.051 (7.9%)        | 264 (8.0%)       | 68.787 (7.9%)    |         | 1.926 (1.4%)           | 9 (1.7%)         | 1.917 (1.4%)     |         |
| Covid-19 positive cases |  | 99.168 (11.4%)       | 303 (9.2%)       | 98.883 (11.4%)   | < 0,001 | 12.133 (9.0%)          | 43 (8.1%)        | 12.090 (9.0%)    | n.s.    |
| Admitted to hospital    |  | 14.374 (1.7%)        | 47 (15.5%)       | 14.327 (14.5%)   | n.s.    | 1.214 (0.9%)           | 12 (27.9%)       | 1.202 (9.9%)     | < 0.001 |
| Admitted to ICU         |  | 1.459 (0.2%)         | <3*              | 1.459 (1.5%)     | -       | 135 (0.1%)             | 3 (7.0%)         | 132 (1.1%)       | < 0.001 |
| Death                   |  | 4.239 (0.5%)         | 5 (1.6%)         | 4.234 (4.3%)     | 0,02    | 58 (0.04%)             | <3*              | 58 (0.5%)        | -       |
| N (%) of reinfections   |  | 2.632 (0.3%)         | 4 (1.3%)         | 2.628 (2.7%)     | n.s.    | 304 (0.2%)             | <3*              | 304 (2.4%)       | -       |

\*assuming zero cases when less than three cases reported (<3)
